# Supplementary material for: O-GlcNAcPRED: a sensitive predictor to capture protein O-GlcNAcylation sites
Source: Royal Society of Chemistry journal article supplement (doi:10.1039/c3mb70326f), 2013-08-23
Supplement: c3mb70326f.pdf [file c3mb70326f.pdf]

**Table S1.** The predictive performance of balanced and unbalanced dataset

| Positive dataset : Negative dataset | Sn (%) | Sp (%) | Acc (%) | MCC           |
|-------------------------------------|--------|--------|---------|---------------|
| 1:1                                 | 80.83  | 78.17  | 79.50   | <b>0.5902</b> |
| 1:2                                 | 60.47  | 88.94  | 79.45   | 0.5215        |
| 1:3                                 | 47.79  | 93.81  | 82.30   | 0.4841        |
| 1:4                                 | 40.71  | 94.69  | 83.89   | 0.4298        |
| 1:5                                 | 34.22  | 96.70  | 86.28   | 0.4141        |

**Table S2.** Euclidean distances between the matrix of complete dataset and 60 subsets

|           |        |        |        |        |               |        |        |        |
|-----------|--------|--------|--------|--------|---------------|--------|--------|--------|
| Datasets  | 1      | 2      | 3      | 4      | 5             | 6      | 7      | 8      |
| Distances | 0.0377 | 0.0319 | 0.0306 | 0.0307 | 0.0306        | 0.0260 | 0.0337 | 0.0362 |
| Datasets  | 9      | 10     | 11     | 12     | 13            | 14     | 15     | 16     |
| Distances | 0.0377 | 0.0399 | 0.0320 | 0.0354 | 0.0279        | 0.0275 | 0.0308 | 0.0318 |
| Datasets  | 17     | 18     | 19     | 20     | 21            | 22     | 23     | 24     |
| Distances | 0.0325 | 0.0274 | 0.0282 | 0.0366 | 0.0279        | 0.0301 | 0.0346 | 0.0367 |
| Datasets  | 25     | 26     | 27     | 28     | 29            | 30     | 31     | 32     |
| Distances | 0.0296 | 0.0267 | 0.0316 | 0.0336 | 0.0355        | 0.0287 | 0.0321 | 0.0277 |
| Datasets  | 33     | 34     | 35     | 36     | <b>37</b>     | 38     | 39     | 40     |
| Distances | 0.0319 | 0.0336 | 0.0267 | 0.0276 | <b>0.0257</b> | 0.0283 | 0.0304 | 0.0281 |
| Datasets  | 41     | 42     | 43     | 44     | 45            | 46     | 47     | 48     |
| Distances | 0.0281 | 0.0372 | 0.0345 | 0.0299 | 0.0338        | 0.0297 | 0.0328 | 0.0297 |
| Datasets  | 49     | 50     | 51     | 52     | 53            | 54     | 55     | 56     |
| Distances | 0.0305 | 0.0354 | 0.0293 | 0.0385 | 0.0386        | 0.0322 | 0.0362 | 0.0319 |
| Datasets  | 57     | 58     | 59     | 60     |               |        |        |        |
| Distances | 0.0293 | 0.0343 | 0.0341 | 0.0336 |               |        |        |        |

**Table S3.** Predictive performances of O-GlcNAcylated sites based on different local window sizes using BPB features on jackknife test

| Window size | Sn (%)       | Sp (%)       | Acc (%)      |
|-------------|--------------|--------------|--------------|
| 11          | 67.26        | 74.34        | 70.80        |
| 13          | 68.44        | 73.16        | 70.80        |
| 15          | 70.80        | 73.45        | 72.12        |
| 17          | 74.04        | 71.98        | 73.01        |
| 19          | 74.63        | 74.04        | 74.34        |
| 21          | 73.45        | 73.16        | 73.30        |
| 23          | 73.45        | 73.45        | 73.45        |
| <b>25</b>   | <b>74.63</b> | <b>74.63</b> | <b>74.63</b> |
| 27          | 74.63        | 74.04        | 74.34        |

**Table S4.** Predictive performances of O-GlcNAcylated sites based on different local window sizes using BRABSB features on jackknife test

| Window size | Sn (%)       | Sp (%)       | Acc (%)      |
|-------------|--------------|--------------|--------------|
| 11          | 74.04        | 75.52        | 74.78        |
| 13          | 71.39        | 74.04        | 72.71        |
| 15          | 73.45        | 72.86        | 73.16        |
| 17          | 75.81        | 73.45        | 74.63        |
| 19          | 75.22        | 75.22        | 75.22        |
| 21          | 74.93        | 74.04        | 74.48        |
| 23          | 77.29        | 76.40        | 76.84        |
| <b>25</b>   | <b>76.40</b> | <b>77.58</b> | <b>76.99</b> |
| 27          | 75.81        | 77.29        | 76.55        |

**Table S5.** Predictive performances of O-GlcNAcylated sites based on different local window sizes using ANBPB features on jackknife test

| Window size | Sn (%)       | Sp (%)       | Acc (%)      |
|-------------|--------------|--------------|--------------|
| 11          | 70.80        | 73.16        | 71.98        |
| 13          | 72.86        | 74.63        | 73.75        |
| 15          | 74.93        | 73.75        | 74.34        |
| 17          | 77.29        | 73.75        | 75.52        |
| 19          | 76.40        | 75.22        | 75.81        |
| 21          | 78.47        | 73.45        | 75.96        |
| <b>23</b>   | <b>79.94</b> | <b>77.58</b> | <b>78.76</b> |
| 25          | 79.35        | 76.99        | 78.17        |
| 27          | 77.58        | 76.70        | 77.14        |

**Table S6.** Predictive performances of O-GlcNAcylated sites based on different local window sizes using relative RANS features on jackknife test

| Window size | Sn (%)       | Sp (%)       | Acc (%)      |
|-------------|--------------|--------------|--------------|
| 11          | 64.60        | 72.57        | 68.58        |
| 13          | 67.55        | 70.21        | 68.88        |
| 15          | 68.73        | 71.98        | 70.35        |
| 17          | 69.91        | 72.27        | 71.09        |
| 19          | 68.44        | 72.86        | 70.65        |
| 21          | 68.73        | 73.16        | 70.94        |
| 23          | 70.21        | 71.68        | 70.94        |
| <b>25</b>   | <b>70.50</b> | <b>72.27</b> | <b>71.39</b> |
| 27          | 69.03        | 73.16        | 71.09        |

**Table S7.** Comparison of O-GlcNAcPRED with YinOYang and OGlcNAcScan on the independent test dataset

| <i>UniProt ID</i> | <i>O-GlcNAcylation site</i> | <i>YinOYang</i> | <i>OGlcNAcScan</i> | <i>O-GlcNAcPRED</i> |
|-------------------|-----------------------------|-----------------|--------------------|---------------------|
| Q15750            | S395                        | +               | +                  | +                   |
|                   | S396                        | -               | -                  | -                   |
|                   | S399                        | -               | -                  | +                   |
|                   | T400                        | +               | -                  | -                   |
|                   | S401                        | +               | -                  | -                   |
| Q7Z589            | S238                        | -               | -                  | -                   |
|                   | T535                        | -               | -                  | +                   |
|                   | S557                        | -               | -                  | +                   |
| P48382            | S439                        | +               | +                  | +                   |
|                   | S442                        | -               | -                  | -                   |
| Q9UHD9            | T113                        | -               | -                  | +                   |
|                   | S116                        | -               | -                  | -                   |
|                   | T124                        | +               | -                  | +                   |
| Q16186            | S213                        | +               | -                  | -                   |
|                   | S220                        | +               | +                  | +                   |
|                   | T221                        | -               | +                  | +                   |
|                   | T222                        | +               | -                  | -                   |
|                   | T225                        | +               | -                  | +                   |
| Q99996            | T2794                       | -               | -                  | -                   |
|                   | T2797                       | -               | -                  | -                   |
| Q6UN15            | T205                        | -               | +                  | +                   |
|                   | T208                        | -               | -                  | +                   |
| Q15723            | T375                        | +               | -                  | +                   |

|        |       |   |   |   |
|--------|-------|---|---|---|
|        | T376  | + | - | + |
|        | S400  | - | + | + |
|        | S500  | + | + | + |
|        | S572  | - | - | + |
| O95487 | S315  | + | + | + |
|        | T341  | + | - | - |
|        | S342  | - | - | - |
| Q32P51 | T74   | - | - | + |
|        | T75   | - | - | - |
| Q86YP4 | T593  | - | - | + |
| Q5JSZ5 | S1982 | + | + | + |
|        | S1984 | - | - | - |
| Q9P2N6 | T860  | - | + | + |
| O00268 | S528  | + | + | + |
|        | T532  | - | - | + |
|        | T533  | + | - | - |
| Q5IRN2 | T192  | - | - | - |
| Q9NZZ3 | T23   | - | - | - |
| Q9UPN6 | T615  | - | - | + |
| Q9NTZ6 | T121  | - | - | - |
|        | S139  | - | - | - |
|        | S143  | - | - | - |
| Q7Z6J0 | S519  | - | + | + |
|        | T520  | - | + | + |
| Q9H1B7 | S179  | + | + | + |
|        | T186  | - | - | - |
| P52597 | S265  | - | - | + |

|               |       |   |   |   |
|---------------|-------|---|---|---|
| Q9UQ35        | S957  | - | - | - |
| B4DKX5        | S772  | - | - | - |
| Q9ULU4        | T750  | + | + | + |
| Q96JB8        | S436  | - | - | + |
| P42167        | S265  | - | + | - |
| Q15942        | S259  | + | - | + |
| Q8IVW6        | T408  | + | - | + |
| P22681        | S601  | + | + | + |
| Q9Y520        | T2242 | - | - | - |
| Q5JPK0        | S411  | - | - | - |
| Q8NEZ4        | T1375 | - | + | + |
| O94842        | T409  | - | - | - |
| O15014        | S1196 | - | + | - |
| P14314        | T287  | - | - | - |
| Q9UQR0        | S568  | - | + | + |
| Q8N3X1        | S797  | + | - | + |
| <b>Q96L91</b> | S3027 | - | + | + |

**Table S8.** Performances comparisons among O-GlcNAcPRED, YinOYang and O-GlcNAcscan

| Prediction methods | Sn (%)       | Sp (%)       | Acc (%) | MCC    |
|--------------------|--------------|--------------|---------|--------|
| YinOYang           | 34.33        | 89.36        | 88.85   | 0.0725 |
| O-GlcNAcscan       | 31.34        | <b>92.45</b> | 91.89   | 0.0847 |
| O-GlcNAcPRED       | <b>56.72</b> | 64.77        | 64.70   | 0.0428 |
